# Supplementary material for: Analysis of Sorafenib Outcome: Focusing on the Clinical Course in Patients with Hepatocellular Carcinoma
Source: PubMed Central journal article supplement (PMC4990272; doi:10.1371/journal.pone.0161303), 2016-08-18
Supplement: pone.0161303.s001.pdf [file pone.0161303.s001.pdf]

**S1 Table.** Baseline demographic data and patient characteristics at the time of starting sorafenib (advanced-stage hepatocellular carcinoma patients)

|                                                                   | All patients | Initial diagnosis as advanced stage | Progressed to advanced stage through intermediate stage | Progressed to advanced stage directly from early stage | <i>P</i> |
|-------------------------------------------------------------------|--------------|-------------------------------------|---------------------------------------------------------|--------------------------------------------------------|----------|
| <b>Number of patients</b>                                         | 123          | 56                                  | 38                                                      | 29                                                     |          |
| <b>Gender [n (%)]</b>                                             |              |                                     |                                                         |                                                        |          |
| Male                                                              | 97 (79)      | 46 (82)                             | 32 (84)                                                 | 19 (66)                                                | 0.128    |
| Female                                                            | 26 (21)      | 10 (18)                             | 6 (16)                                                  | 10 (34)                                                |          |
| <b>Age, years [n (%)]</b>                                         |              |                                     |                                                         |                                                        |          |
| ≤72                                                               | 67 (54)      | 34 (61)                             | 21 (55)                                                 | 12 (41)                                                | 0.235    |
| >72                                                               | 56 (46)      | 22 (39)                             | 17 (45)                                                 | 17 (59)                                                |          |
| <b>HBV [n (%)]</b>                                                |              |                                     |                                                         |                                                        |          |
| Absent                                                            | 100 (81)     | 42 (75)                             | 32 (84)                                                 | 26 (90)                                                | 0.223    |
| Present                                                           | 23 (19)      | 14 (25)                             | 6 (16)                                                  | 3 (10)                                                 |          |
| <b>HCV [n (%)]</b>                                                |              |                                     |                                                         |                                                        |          |
| Absent                                                            | 72 (59)      | 42 (75)                             | 21 (55)                                                 | 9 (31)                                                 | <0.001   |
| Present                                                           | 51 (41)      | 14 (25)                             | 17 (45)                                                 | 20 (69)                                                |          |
| <b>Alcohol abuse [n (%)]</b>                                      |              |                                     |                                                         |                                                        |          |
| Absent                                                            | 108 (88)     | 48 (86)                             | 33 (87)                                                 | 27 (93)                                                | 0.600    |
| Present                                                           | 15 (12)      | 8 (14)                              | 5 (13)                                                  | 2 (7)                                                  |          |
| <b>ECOG-PS &gt;0 [n (%)]</b>                                      |              |                                     |                                                         |                                                        |          |
| Absent                                                            | 53 (43)      | 27 (48)                             | 11 (29)                                                 | 15 (52)                                                | 0.101    |
| Present                                                           | 70 (57)      | 29 (52)                             | 27 (71)                                                 | 14 (48)                                                |          |
| <b>Child–Pugh [n (%)]</b>                                         |              |                                     |                                                         |                                                        |          |
| A                                                                 | 87 (71)      | 32 (57)                             | 29 (76)                                                 | 26 (90)                                                | 0.005    |
| B                                                                 | 36 (29)      | 24 (43)                             | 9 (24)                                                  | 3 (10)                                                 |          |
| <b>Status of Intrahepatic lesions [n (%)]</b>                     |              |                                     |                                                         |                                                        |          |
| None                                                              | 13 (11)      | 3 (5)                               | 1 (3)                                                   | 9 (31)                                                 | <0.001   |
| Without MVI                                                       | 43 (35)      | 11 (20)                             | 23 (61)                                                 | 9 (31)                                                 |          |
| With MVI                                                          | 67 (54)      | 42 (75)                             | 14 (37)                                                 | 11 (38)                                                |          |
| <b>Maximum size of the intrahepatic lesion, &gt;50 mm [n (%)]</b> |              |                                     |                                                         |                                                        |          |
| Absent                                                            | 74 (60)      | 19 (34)                             | 29 (76)                                                 | 26 (90)                                                | <0.001   |
| Present                                                           | 49 (40)      | 37 (66)                             | 9 (24)                                                  | 3 (10)                                                 |          |
| <b>Number of intrahepatic lesions, &gt;7 [n (%)]</b>              |              |                                     |                                                         |                                                        |          |
| Absent                                                            | 59 (48)      | 23 (41)                             | 15 (39)                                                 | 21 (72)                                                | 0.011    |
| Present                                                           | 64 (52)      | 33 (59)                             | 23 (61)                                                 | 8 (28)                                                 |          |
| <b>EHM [n (%)]</b>                                                |              |                                     |                                                         |                                                        |          |
| Absent                                                            | 38 (31)      | 23 (41)                             | 9 (24)                                                  | 6 (21)                                                 | 0.080    |
| Present                                                           | 85 (69)      | 33 (59)                             | 29 (76)                                                 | 23 (79)                                                |          |
| <b>AFP, ng/mL [n (%)]</b>                                         |              |                                     |                                                         |                                                        |          |
| ≤400                                                              | 61 (50)      | 24 (43)                             | 20 (53)                                                 | 17 (59)                                                | 0.350    |
| >400                                                              | 62 (50)      | 32 (57)                             | 18 (47)                                                 | 12 (41)                                                |          |
| <b>Pre-treatment [n (%)]</b>                                      |              |                                     |                                                         |                                                        |          |
| Absent                                                            | 21 (17)      | 21 (38)                             | 0 (0)                                                   | 0 (0)                                                  | <0.001   |
| Present                                                           | 102 (83)     | 35 (63)                             | 38 (100)                                                | 29 (100)                                               |          |
| <b>Initial dose of sorafenib, 800 mg/day [n (%)]</b>              |              |                                     |                                                         |                                                        |          |
| Absent                                                            | 8 (7)        | 4 (7)                               | 2 (5)                                                   | 2 (7)                                                  | 0.932    |
| Present                                                           | 115 (93)     | 52 (93)                             | 36 (95)                                                 | 27 (93)                                                |          |
| <b>Average daily dose [n (%)]</b>                                 |              |                                     |                                                         |                                                        |          |
| >400 mg                                                           | 58 (47)      | 25 (45)                             | 17 (45)                                                 | 16 (55)                                                | 0.613    |
| ≤400 mg                                                           | 65 (53)      | 31 (55)                             | 21 (55)                                                 | 13 (45)                                                |          |

Abbreviations: HBV, hepatitis B virus; HCV, hepatitis C virus; ECOG-PS, Eastern Cooperative Oncology Group performance status; MVI, macrovascular invasion; EHM, extrahepatic metastasis; AFP, alpha-fetoprotein
