# Supplementary material for: Analysis of Sorafenib Outcome: Focusing on the Clinical Course in Patients with Hepatocellular Carcinoma
Source: PubMed Central journal article supplement (PMC4990272; doi:10.1371/journal.pone.0161303), 2016-08-18
Supplement: pone.0161303.s002.pdf [file pone.0161303.s002.pdf]

**S2 Table.** Univariate analysis of survival in sorafenib-treated patients with advanced-stage hepatocellular carcinoma

| Variables                                                 | Univariate analysis |             | <i>P</i> |
|-----------------------------------------------------------|---------------------|-------------|----------|
|                                                           | Hazard ratio        | 95% CI      |          |
| <b>Gender, male</b>                                       |                     |             |          |
| Absent                                                    | Reference           |             |          |
| Present                                                   | 0.907               | 0.540–1.522 | 0.711    |
| <b>Age, &gt;72 years</b>                                  |                     |             |          |
| Absent                                                    | Reference           |             |          |
| Present                                                   | 0.733               | 0.493–1.091 | 0.126    |
| <b>HBV</b>                                                |                     |             |          |
| Absent                                                    | Reference           |             |          |
| Present                                                   | 1.313               | 0.784–2.201 | 0.301    |
| <b>HCV</b>                                                |                     |             |          |
| Absent                                                    | Reference           |             |          |
| Present                                                   | 0.683               | 0.452–1.033 | 0.071    |
| <b>Alcohol abuse</b>                                      |                     |             |          |
| Absent                                                    | Reference           |             |          |
| Present                                                   | 1.200               | 0.679–2.121 | 0.529    |
| <b>ECOG-PS, &gt;0</b>                                     |                     |             |          |
| Absent                                                    | Reference           |             |          |
| Present                                                   | 1.936               | 1.282–2.922 | 0.002    |
| <b>Child–Pugh B</b>                                       |                     |             |          |
| Absent                                                    | Reference           |             |          |
| Present                                                   | 2.400               | 1.561–3.690 | <0.001   |
| <b>Status of intrahepatic lesions</b>                     |                     |             |          |
| None                                                      | 0.610               | 0.282–1.320 | 0.210    |
| Without MVI                                               | Reference           |             |          |
| With MVI                                                  | 2.200               | 1.408–3.437 | 0.001    |
| <b>Maximum size of the intrahepatic lesion, &gt;50 mm</b> |                     |             |          |
| Absent                                                    | Reference           |             |          |
| Present                                                   | 1.528               | 1.021–2.288 | 0.039    |
| <b>Number of intrahepatic lesions, &gt;7</b>              |                     |             |          |
| Absent                                                    | Reference           |             |          |
| Present                                                   | 2.281               | 1.522–3.418 | <0.001   |
| <b>EHM</b>                                                |                     |             |          |
| Absent                                                    | Reference           |             |          |
| Present                                                   | 0.787               | 0.508–1.221 | 0.787    |
| <b>AFP, &gt;400 ng/mL</b>                                 |                     |             |          |
| Absent                                                    | Reference           |             |          |
| Present                                                   | 1.418               | 0.954–2.106 | 0.084    |
| <b>Pre-treatment</b>                                      |                     |             |          |
| Absent                                                    | Reference           |             |          |
| Present                                                   | 0.673               | 0.391–1.157 | 0.152    |
| <b>Stage progression process</b>                          |                     |             |          |
| Progress directly from early stage                        | Reference           |             |          |
| Others                                                    | 1.762               | 1.060–2.858 | 0.022    |
| <b>Average daily dose, ≤400 mg/day</b>                    |                     |             |          |
| Absent                                                    | Reference           |             |          |
| Present                                                   | 0.935               | 0.629–1.388 | 0.737    |

Abbreviations: HBV, hepatitis B virus; HCV, hepatitis C virus; ECOG-PS, Eastern Cooperative Oncology Group performance status; MVI, macrovascular invasion; EHM, extrahepatic metastasis; AFP, alpha-fetoprotein
