# Supplementary material for: Analysis of Sorafenib Outcome: Focusing on the Clinical Course in Patients with Hepatocellular Carcinoma
Source: PubMed Central journal article supplement (PMC4990272; doi:10.1371/journal.pone.0161303), 2016-08-18
Supplement: pone.0161303.s003.pdf [file pone.0161303.s003.pdf]

**S3 Table.** Baseline demographic data and patient characteristics at the time of starting sorafenib (intermediate-stage hepatocellular carcinoma patients)

|                                                                           | All patients | Initial diagnosis as intermediate stage | Initial diagnosis as early stage | <i>P</i> |
|---------------------------------------------------------------------------|--------------|-----------------------------------------|----------------------------------|----------|
| <b>Number of patients</b>                                                 | 67           | 32                                      | 35                               |          |
| <b>Gender</b> [ <i>n</i> (%)]                                             |              |                                         |                                  |          |
| Male                                                                      | 49 (73)      | 21 (66)                                 | 28 (80)                          | 0.270    |
| Female                                                                    | 18 (27)      | 11 (34)                                 | 7 (20)                           |          |
| <b>Age, years</b> [ <i>n</i> (%)]                                         |              |                                         |                                  |          |
| ≤72                                                                       | 36 (54)      | 16 (50)                                 | 20 (57)                          | 0.628    |
| >72                                                                       | 31 (46)      | 16 (50)                                 | 15 (43)                          |          |
| <b>HBV</b> [ <i>n</i> (%)]                                                |              |                                         |                                  |          |
| Absent                                                                    | 62 (93)      | 29 (91)                                 | 33 (94)                          | 0.664    |
| Present                                                                   | 5 (7)        | 3 (9)                                   | 2 (6)                            |          |
| <b>HCV</b> [ <i>n</i> (%)]                                                |              |                                         |                                  |          |
| Absent                                                                    | 23 (34)      | 17 (53)                                 | 6 (17)                           | 0.004    |
| Present                                                                   | 44 (66)      | 15 (47)                                 | 29 (83)                          |          |
| <b>Alcohol abuse</b> [ <i>n</i> (%)]                                      |              |                                         |                                  |          |
| Absent                                                                    | 65 (97)      | 31 (97)                                 | 34 (97)                          | 1.000    |
| Present                                                                   | 2 (3)        | 1 (3)                                   | 1 (3)                            |          |
| <b>ECOG-PS &gt;0</b> [ <i>n</i> (%)]                                      |              |                                         |                                  |          |
| Absent                                                                    | 43 (64)      | 22 (69)                                 | 21 (60)                          | 0.611    |
| Present                                                                   | 24 (36)      | 10 (31)                                 | 14 (40)                          |          |
| <b>Child–Pugh</b> [ <i>n</i> (%)]                                         |              |                                         |                                  |          |
| A                                                                         | 51 (76)      | 25 (78)                                 | 26 (74)                          | 0.780    |
| B                                                                         | 16 (24)      | 7 (22)                                  | 9 (26)                           |          |
| <b>Maximum size of the intrahepatic lesion, &gt;50 mm</b> [ <i>n</i> (%)] |              |                                         |                                  |          |
| Absent                                                                    | 49 (73)      | 23 (72)                                 | 26 (74)                          | 1.000    |
| Present                                                                   | 18 (27)      | 9 (28)                                  | 9 (26)                           |          |
| <b>Number of intrahepatic lesions, &gt;7</b> [ <i>n</i> (%)]              |              |                                         |                                  |          |
| Absent                                                                    | 18 (27)      | 9 (28)                                  | 9 (26)                           | 1.000    |
| Present                                                                   | 49 (73)      | 23 (72)                                 | 26 (74)                          |          |
| <b>Sub-classification of BCLC B</b> [ <i>n</i> (%)]                       |              |                                         |                                  |          |
| B1                                                                        | 3 (4)        | 2 (6)                                   | 1 (3)                            | 0.803    |
| B2                                                                        | 29 (43)      | 15 (47)                                 | 14 (40)                          |          |
| B3                                                                        | 11 (16)      | 5 (16)                                  | 6 (17)                           |          |
| B4                                                                        | 24 (36)      | 10 (31)                                 | 14 (40)                          |          |
| <b>AFP, ng/mL</b> [ <i>n</i> (%)]                                         |              |                                         |                                  |          |
| ≤400                                                                      | 45 (67)      | 22 (69)                                 | 23 (66)                          | 1.000    |
| >400                                                                      | 22 (33)      | 10 (31)                                 | 12 (34)                          |          |
| <b>Pre-treatment</b> [ <i>n</i> (%)]                                      |              |                                         |                                  |          |
| Absent                                                                    | 0 (0)        | 0 (0)                                   | 0 (0)                            | 1.000    |
| Present                                                                   | 67 (100)     | 32 (100)                                | 35 (100)                         |          |
| <b>Initial dose of sorafenib, 800 mg/day</b> [ <i>n</i> (%)]              |              |                                         |                                  |          |
| Absent                                                                    | 5 (7)        | 1 (3)                                   | 4 (11)                           | 1.000    |
| Present                                                                   | 62 (93)      | 31 (97)                                 | 31 (89)                          |          |
| <b>Average daily dose</b> [ <i>n</i> (%)]                                 |              |                                         |                                  |          |
| >400 mg                                                                   | 40 (60)      | 20 (63)                                 | 20 (57)                          | 0.804    |
| ≤400 mg                                                                   | 27 (40)      | 12 (37)                                 | 15 (43)                          |          |

Abbreviations: HBV, hepatitis B virus; HCV, hepatitis C virus; ECOG-PS, Eastern Cooperative Oncology Group performance status; MVI, macrovascular invasion; EHM, extrahepatic metastasis; BCLC, Barcelona clinic liver cancer; AFP, alpha-fetoprotein
