# Supplementary material for: Analysis of Sorafenib Outcome: Focusing on the Clinical Course in Patients with Hepatocellular Carcinoma
Source: PubMed Central journal article supplement (PMC4990272; doi:10.1371/journal.pone.0161303), 2016-08-18
Supplement: pone.0161303.s005.pdf [file pone.0161303.s005.pdf]

**S5 Table.** Progression pattern of sorafenib treatment, liver function deterioration at the end of sorafenib treatment, and post-sorafenib therapy

|                                     | N (%)   | OS<br>(months)   | P<br>(Log-rank) | BSC | Post-sorafenib therapy |      |      |        |
|-------------------------------------|---------|------------------|-----------------|-----|------------------------|------|------|--------|
|                                     |         |                  |                 |     | Clinical trial         | TACE | HAIC | Others |
| <b>Advanced stage</b>               | 123     |                  |                 | 79  | 15                     | 23   | 5    | 1      |
| <b>Intrahepatic lesion growth</b>   |         |                  |                 |     |                        |      |      |        |
| Absent                              | 65 (53) | 5.9 (4.3–7.6)    | 0.239           | 49  | 4                      | 10   | 1    | 1      |
| Present                             | 58 (47) | 8.8 (4.5–13.1)   |                 | 30  | 11                     | 13   | 4    | 0      |
| <b>Extrahepatic lesion growth</b>   |         |                  |                 |     |                        |      |      |        |
| Absent                              | 88 (72) | 5.9 (3.5–8.2)    | 0.143           | 59  | 9                      | 16   | 4    | 0      |
| Present                             | 35 (28) | 15.3 (5.9–24.7)  |                 | 20  | 6                      | 7    | 1    | 1      |
| <b>New intrahepatic lesion</b>      |         |                  |                 |     |                        |      |      |        |
| Absent                              | 79 (64) | 8.0 (5.2–10.8)   | 0.613           | 57  | 10                     | 7    | 4    | 1      |
| Present                             | 44 (36) | 7.5 (4.4–10.6)   |                 | 22  | 5                      | 16   | 1    | 0      |
| <b>New extrahepatic lesion</b>      |         |                  |                 |     |                        |      |      |        |
| Absent                              | 73 (59) | 13.9 (7.5–20.2)  | <0.001          | 40  | 13                     | 16   | 3    | 1      |
| Present                             | 50 (41) | 5.4 (3.4–7.5)    |                 | 39  | 2                      | 7    | 2    | 0      |
| <b>Liver function deterioration</b> |         |                  |                 |     |                        |      |      |        |
| Absent                              | 75 (61) | 14.6 (9.1–20.2)  | <0.001          | 34  | 14                     | 21   | 5    | 1      |
| Present                             | 48 (39) | 4.5 (3.4–5.7)    |                 | 45  | 1                      | 2    | 0    | 0      |
| <b>Intermediate stage</b>           | 67      |                  |                 | 33  | 13                     | 20   | 1    | 0      |
| <b>Intrahepatic lesion growth</b>   |         |                  |                 |     |                        |      |      |        |
| Absent                              | 18 (27) | 12.1 (6.8–17.5)  | 0.787           | 9   | 4                      | 5    | 0    | 0      |
| Present                             | 49 (73) | 13.8 (10.3–17.2) |                 | 24  | 9                      | 15   | 1    | 0      |
| <b>New intrahepatic lesion</b>      |         |                  |                 |     |                        |      |      |        |
| Absent                              | 27 (40) | 23.2 (13.7–32.7) | 0.017           | 10  | 7                      | 10   | 0    | 0      |
| Present                             | 40 (60) | 11.0 (8.3–13.8)  |                 | 23  | 6                      | 10   | 1    | 0      |
| <b>New extrahepatic lesion</b>      |         |                  |                 |     |                        |      |      |        |
| Absent                              | 56 (84) | 13.8 (11.2–16.3) | 0.060           | 28  | 11                     | 17   | 0    | 0      |
| Present                             | 11 (16) | 7.1 (0.0–14.2)   |                 | 5   | 2                      | 3    | 1    | 0      |
| <b>Liver function deterioration</b> |         |                  |                 |     |                        |      |      |        |
| Absent                              | 54 (81) | 14.5 (10.5–18.5) | <0.001          | 22  | 13                     | 18   | 1    | 0      |
| Present                             | 13 (19) | 7.1 (1.9–12.3)   |                 | 11  | 0                      | 2    | 0    | 0      |

Abbreviations: OS, overall survival; BSC, best supportive care; TACE, transcatheter arterial chemoembolization; HAIC, hepatic arterial infusion chemotherapy
