# Supplementary material for: Analysis of Sorafenib Outcome: Focusing on the Clinical Course in Patients with Hepatocellular Carcinoma
Source: PubMed Central journal article supplement (PMC4990272; doi:10.1371/journal.pone.0161303), 2016-08-18
Supplement: pone.0161303.s006.pdf [file pone.0161303.s006.pdf]

**S6 Table.** Baseline demographic data and patient characteristics at the time of being diagnosed with intermediate-stage hepatocellular carcinoma (propensity score matched dataset)

|                                                                               | <b>Starting sorafenib<br/>before progressing<br/>to advanced stage</b> | <b>Starting sorafenib<br/>after progressing<br/>to advanced stage</b> | <b><i>P</i></b> |
|-------------------------------------------------------------------------------|------------------------------------------------------------------------|-----------------------------------------------------------------------|-----------------|
| <b>Number of patients</b>                                                     | 36                                                                     | 36                                                                    |                 |
| <b>Gender [<i>n</i> (%)]</b>                                                  |                                                                        |                                                                       |                 |
| Male                                                                          | 31 (86)                                                                | 30 (83)                                                               | 1.000           |
| Female                                                                        | 5 (14)                                                                 | 6 (17)                                                                |                 |
| <b>Age, years [<i>n</i> (%)]</b>                                              |                                                                        |                                                                       |                 |
| ≤72                                                                           | 22 (61)                                                                | 22 (61)                                                               | 1.000           |
| >72                                                                           | 14 (39)                                                                | 14 (39)                                                               |                 |
| <b>HBV [<i>n</i> (%)]</b>                                                     |                                                                        |                                                                       |                 |
| Absent                                                                        | 35 (93)                                                                | 31 (86)                                                               | 0.199           |
| Present                                                                       | 1 (7)                                                                  | 5 (14)                                                                |                 |
| <b>HCV [<i>n</i> (%)]</b>                                                     |                                                                        |                                                                       |                 |
| Absent                                                                        | 9 (25)                                                                 | 20 (56)                                                               | 0.016           |
| Present                                                                       | 27 (75)                                                                | 16 (44)                                                               |                 |
| <b>Alcohol abuse [<i>n</i> (%)]</b>                                           |                                                                        |                                                                       |                 |
| Absent                                                                        | 36 (100)                                                               | 31 (86)                                                               | 0.054           |
| Present                                                                       | 0 (0)                                                                  | 5 (14)                                                                |                 |
| <b>Child–Pugh [<i>n</i> (%)]</b>                                              |                                                                        |                                                                       |                 |
| A                                                                             | 35 (97)                                                                | 34 (94)                                                               | 1.000           |
| B                                                                             | 1 (3)                                                                  | 2 (6)                                                                 |                 |
| <b>Maximum size of the intrahepatic lesion, &gt;50<br/>mm [<i>n</i> (%)]</b>  |                                                                        |                                                                       |                 |
| Absent                                                                        | 27 (75)                                                                | 26 (72)                                                               | 1.000           |
| Present                                                                       | 9 (25)                                                                 | 10 (28)                                                               |                 |
| <b>Number of intrahepatic lesions, &gt;7 [<i>n</i> (%)]</b>                   |                                                                        |                                                                       |                 |
| Absent                                                                        | 25 (69)                                                                | 26 (72)                                                               | 1.000           |
| Present                                                                       | 11 (31)                                                                | 10 (28)                                                               |                 |
| <b>Sub-classification of BCLC B [<i>n</i> (%)]</b>                            |                                                                        |                                                                       |                 |
| B1                                                                            | 13 (36)                                                                | 11 (31)                                                               | 0.539           |
| B2                                                                            | 23 (64)                                                                | 23 (64)                                                               |                 |
| B3                                                                            | 0 (0)                                                                  | 1 (3)                                                                 |                 |
| B4                                                                            | 0 (0)                                                                  | 1 (3)                                                                 |                 |
| <b>AFP, ng/mL [<i>n</i> (%)]</b>                                              |                                                                        |                                                                       |                 |
| ≤400                                                                          | 24 (67)                                                                | 25 (69)                                                               | 1.000           |
| >400                                                                          | 12 (33)                                                                | 11 (31)                                                               |                 |
| <b>Initial diagnosis [<i>n</i> (%)]</b>                                       |                                                                        |                                                                       |                 |
| Early stage                                                                   | 18 (50)                                                                | 14 (39)                                                               | 0.477           |
| Intermediate stage                                                            | 18 (50)                                                                | 22 (61)                                                               |                 |
| <b>Initial dose of sorafenib, 800 mg/day [<i>n</i> (%)]</b>                   |                                                                        |                                                                       |                 |
| Absent                                                                        | 1 (3)                                                                  | 2 (6)                                                                 | 1.000           |
| Present                                                                       | 35 (97)                                                                | 34 (94)                                                               |                 |
| <b>Effectiveness of initial TACE in intermediate<br/>stage [<i>n</i> (%)]</b> |                                                                        |                                                                       |                 |
| Responder                                                                     | 22 (61)                                                                | 24 (67)                                                               | 0.807           |
| Non-responder                                                                 | 14 (39)                                                                | 12 (33)                                                               |                 |

Abbreviations: HBV, hepatitis B virus; HCV, hepatitis C virus; BCLC, Barcelona clinic liver cancer; AFP, alpha-fetoprotein;

TACE, transcatheter arterial chemoembolization
