# Supplementary material for: Analysis of Sorafenib Outcome: Focusing on the Clinical Course in Patients with Hepatocellular Carcinoma
Source: PubMed Central journal article supplement (PMC4990272; doi:10.1371/journal.pone.0161303), 2016-08-18
Supplement: pone.0161303.s007.pdf [file pone.0161303.s007.pdf]

S7 Table. Univariate analysis of survival after being diagnosed with intermediate stage hepatocellular carcinoma

| Variables                                                  | Univariate analysis |             | P       |
|------------------------------------------------------------|---------------------|-------------|---------|
|                                                            | Hazard ratio        | 95% CI      |         |
| <b>Any patients (n = 105)</b>                              |                     |             |         |
| <b>Gender, male</b>                                        |                     |             |         |
| Absent                                                     | Reference           |             |         |
| Present                                                    | 0.880               | 0.507–1.527 | 0.650   |
| <b>Age, &gt;72 years</b>                                   |                     |             |         |
| Absent                                                     | Reference           |             |         |
| Present                                                    | 1.175               | 0.742–1.862 | 0.491   |
| <b>HBV</b>                                                 |                     |             |         |
| Absent                                                     | Reference           |             |         |
| Present                                                    | 0.980               | 0.471–2.040 | 0.958   |
| <b>HCV</b>                                                 |                     |             |         |
| Absent                                                     | Reference           |             |         |
| Present                                                    | 0.845               | 0.545–1.311 | 0.452   |
| <b>Alcohol abuse</b>                                       |                     |             |         |
| Absent                                                     | Reference           |             |         |
| Present                                                    | 0.786               | 0.336–1.839 | 0.579   |
| <b>Child–Pugh B</b>                                        |                     |             |         |
| Absent                                                     | Reference           |             |         |
| Present                                                    | 2.132               | 1.013–4.487 | 0.046   |
| <b>Maximum size of the intrahepatic lesion, &gt;50 mm</b>  |                     |             |         |
| Absent                                                     | Reference           |             |         |
| Present                                                    | 1.148               | 0.696–1.895 | 0.588   |
| <b>Number of intrahepatic lesions, &gt;7</b>               |                     |             |         |
| Absent                                                     | Reference           |             |         |
| Present                                                    | 1.376               | 0.881–2.150 | 0.160   |
| <b>AFP, &gt;400 ng/mL</b>                                  |                     |             |         |
| Absent                                                     | Reference           |             |         |
| Present                                                    | 1.501               | 0.927–2.431 | 0.099   |
| <b>Initial diagnosis</b>                                   |                     |             |         |
| Early stage                                                | Reference           |             |         |
| Intermediate stage                                         | 1.146               | 0.741–1.773 | 0.541   |
| <b>Effectiveness of initial TACE in intermediate stage</b> |                     |             |         |
| Responder                                                  | Reference           |             |         |
| Non-responder                                              | 2.959               | 1.845–4.745 | < 0.001 |
| <b>Administration timing of sorafenib</b>                  |                     |             |         |
| Conversion before progressing to advanced stage            | Reference           |             |         |
| Conversion after progressing to advanced stage             | 1.692               | 1.083–2.641 | 0.021   |
| <b>Propensity score matched dataset (n = 72)</b>           |                     |             |         |
| <b>Gender, male</b>                                        |                     |             |         |
| Absent                                                     | Reference           |             |         |
| Present                                                    | 0.801               | 0.415–1.546 | 0.508   |
| <b>Age, &gt;72 years</b>                                   |                     |             |         |
| Absent                                                     | Reference           |             |         |
| Present                                                    | 1.127               | 0.663–1.918 | 0.658   |
| <b>HBV</b>                                                 |                     |             |         |
| Absent                                                     | Reference           |             |         |
| Present                                                    | 0.594               | 0.214–1.646 | 0.317   |
| <b>HCV</b>                                                 |                     |             |         |
| Absent                                                     | Reference           |             |         |
| Present                                                    | 0.948               | 0.560–1.603 | 0.841   |
| <b>Alcohol abuse</b>                                       |                     |             |         |
| Absent                                                     | Reference           |             |         |
| Present                                                    | 0.987               | 0.356–2.738 | 0.981   |
| <b>Child–Pugh B</b>                                        |                     |             |         |
| Absent                                                     | Reference           |             |         |
| Present                                                    | 2.504               | 0.772–8.122 | 0.126   |
| <b>Maximum size of the intrahepatic lesion, &gt;50 mm</b>  |                     |             |         |
| Absent                                                     | Reference           |             |         |
| Present                                                    | 1.406               | 0.768–2.574 | 0.269   |
| <b>Number of intrahepatic lesions, &gt;7</b>               |                     |             |         |
| Absent                                                     | Reference           |             |         |
| Present                                                    | 1.485               | 0.857–2.575 | 0.159   |
| <b>AFP, &gt;400 ng/mL</b>                                  |                     |             |         |
| Absent                                                     | Reference           |             |         |
| Present                                                    | 1.400               | 0.808–2.426 | 0.230   |
| <b>Initial diagnosis</b>                                   |                     |             |         |
| Early stage                                                | Reference           |             |         |
| Intermediate stage                                         | 1.177               | 0.705–1.965 | 0.533   |
| <b>Effectiveness of initial TACE in intermediate-stage</b> |                     |             |         |
| Responder                                                  | Reference           |             |         |
| Non-responder                                              | 2.584               | 1.475–4.526 | 0.001   |
| <b>Administration timing of sorafenib</b>                  |                     |             |         |
| Conversion before progressing to advanced-stage            | Reference           |             |         |
| Conversion after progressing to advanced-stage             | 1.765               | 1.051–2.962 | 0.032   |

Abbreviations: HBV, hepatitis B virus; HCV, hepatitis C virus; AFP, alpha-fetoprotein; TACE, transarterial chemoembolization.
